# Supplementary material
Source: PubMed Central journal article supplement (PMC9536124)
Supplement: sj-pdf-1-jcb-10.1177_0271678X221101644.pdf [file sj-pdf-1-jcb-10.1177_0271678X221101644.pdf]

## SUPPLEMENTAL MATERIAL

### **Global Changes in Diffusion Tensor Imaging During Acute Ischemic Stroke and Post-Stroke Cognitive Performance**

Kyle C. Kern, MD MS<sup>1</sup>; Clinton B. Wright, MD MS<sup>1</sup>; and Richard Leigh, MD<sup>1,2</sup>

1. National Institute of Neurological Disorders and Stroke, National Institutes of Health, Bethesda, MD (K.K., C.W., R.L.)

2. Department of Neurology, Johns Hopkins University School of Medicine, Baltimore, MD (R.L.)

Corresponding Author:

Richard Leigh, MD

600 N. Wolfe Street

Phipps 4, Suite 446

Baltimore, MD 21287

Phone: 410-955-2228

Fax: 410-614-9807

Email: rleigh4@jhu.edu

Supplemental Figure I: Infarct Overlap Map

Supplemental Figure II: Change in Telephone MoCA Score

**Supplemental Figures I – II**

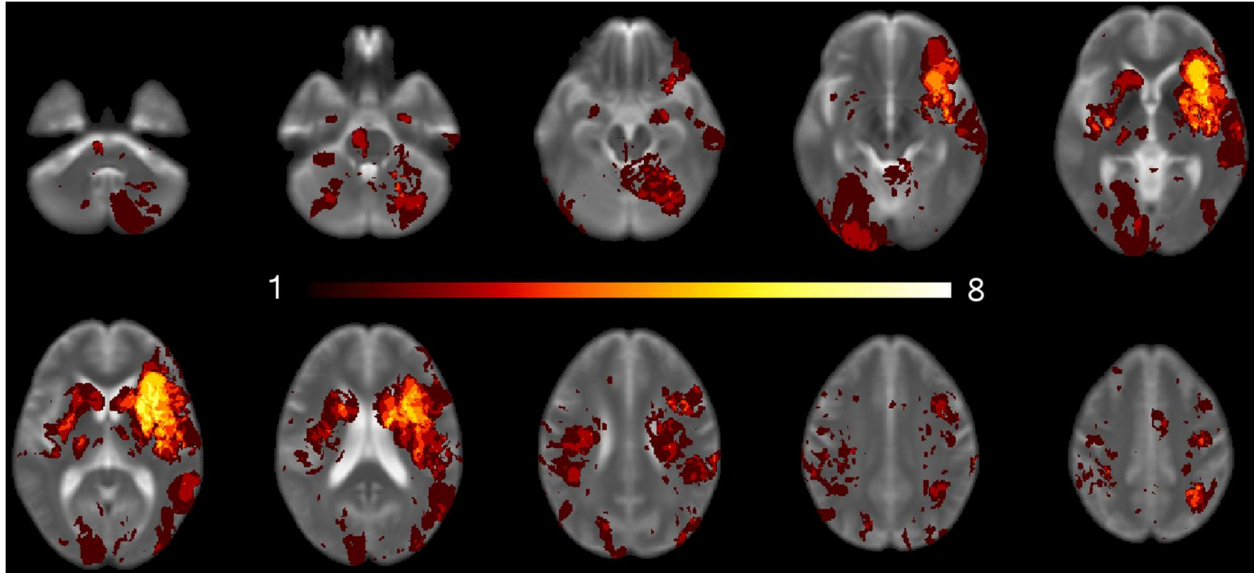

**Supplemental Figure I. Infarct Overlay Map.** Infarct volumes ( $n = 71$ ) were projected into Montreal Neurologic Institute atlas space using nonlinear alignments. Infarct masks were summed to create an infarct overlay map. Maximum overlap was 8.

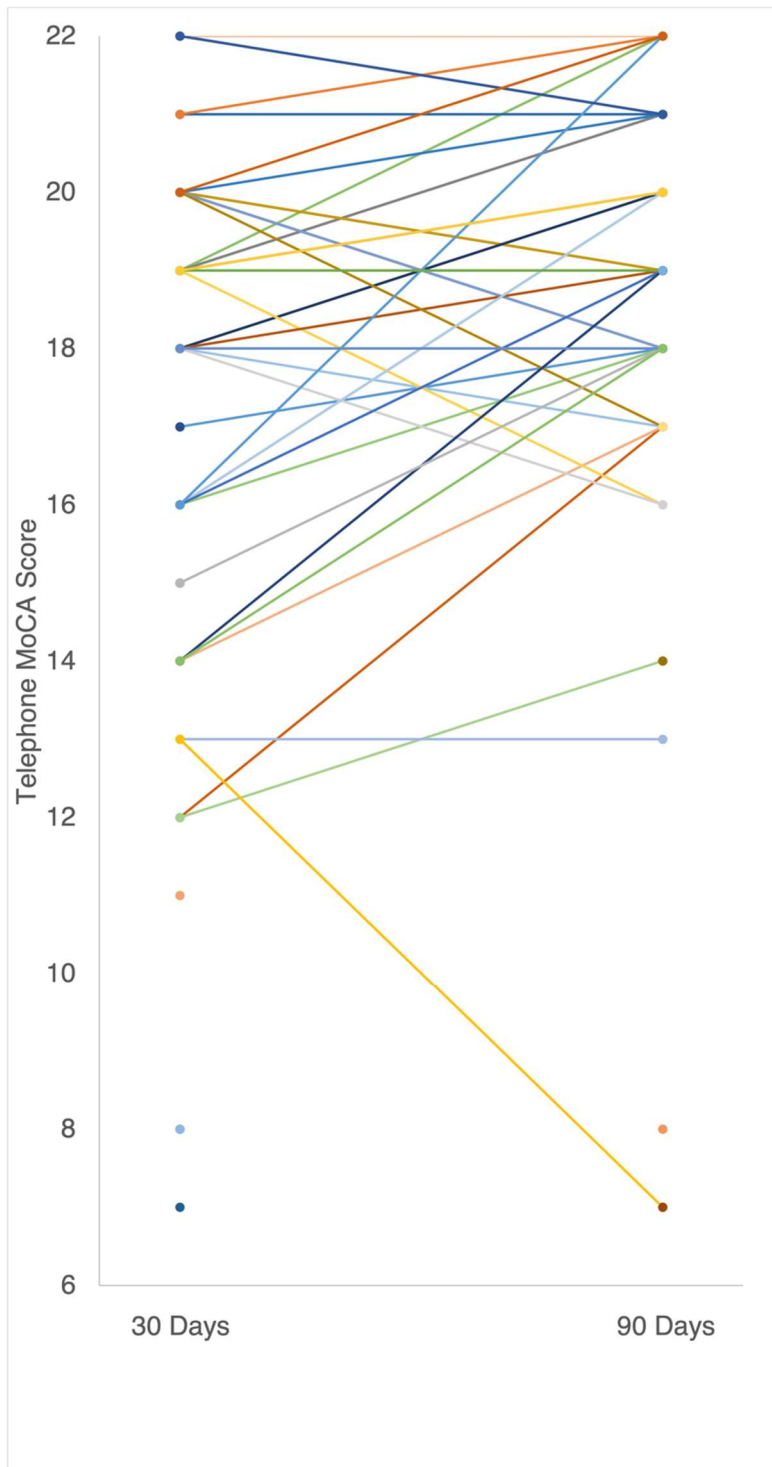

**Supplemental Figure II. Change in Telephone MoCA Score.** Telephone Montreal Cognitive Assessment (T-MoCA) subcomponents were used for comparison. Optimal cutoff for multi-domain cognitive impairment on the T-MoCA is 18 to 19.<sup>29</sup> MoCA was performed at 30 days (81% face-to-face) with median MoCA score of  $26 \pm 5$  ( $n = 49$ ) and median telephone MoCA score of  $18 \pm 4$  ( $n = 63$ ). T-MoCA performed at 90 days had median score  $19 \pm 3$  ( $n = 58$ ). In 47 patients with both timepoints, mean T-MoCA score increased by  $0.7 \pm 2.3$  points (paired T-test,  $p=0.03$ ).
